# Supplementary material for: Synthesis, stability and bonding situation of tris-, bis- and mono[9-(azuleno[1,2-b]thienyl)]methyl cationsElectronic supplementary information (ESI) available: CV waves of compounds 7a, 8a and 9a, redox details of compounds 7a,b, 8a,b, and 9a,b along with those of 4a, 5a and 6a, ORTEP drawings and details of the X-ray analyses of compounds 2b and 9b and NMR details of the compounds reported. See http://www.rsc.org/suppdata/ob/b3/b302688d/
Source: Royal Society of Chemistry journal article supplement (doi:10.1039/b302688d), 2003-01-01
Supplement: b302688d.pdf [file b302688d.pdf]

**Synthesis, stability and bonding situation of tris-, bis- and mono[9-(azuleno[1,2-*b*][thienyl)]methyl cations**

Shunji Ito,<sup>\*a</sup> Takahiro Kubo,<sup>a</sup> Mao Kondo,<sup>a</sup> Chizuko Kabuto,<sup>a</sup> Noboru Morita,<sup>a</sup> Toyonobu Asao,<sup>a</sup> Kunihide Fujimori,<sup>b</sup> Masataka Watanabe,<sup>c</sup> Nobuyuki Harada,<sup>c</sup> and Masafumi Yasunami<sup>d</sup>

<sup>a</sup> Department of Chemistry, Graduate School of Science, Tohoku University, Sendai 980-8578, Japan

<sup>b</sup> Department of Chemistry, Faculty of Science, Shinshu University, Matsumoto 390-8621, Japan

<sup>c</sup> Institute of Multidisciplinary Research for Advanced Materials, Tohoku University, Sendai 980-8577, Japan

<sup>d</sup> Department of Materials Science and Engineering, College of Engineering, Nihon University, Koriyama 963-1165, Japan

**Electronic supplementary information (ESI)**

CV waves of compounds **7a**, **8a** and **9a**, redox details of compounds **7a,b**, **8a,b** and **9a,b** along with those of **4a**, **5a** and **6a**, ORTEP drawings and details of the X-ray analysis of compounds **2b** and **9b** and NMR details of compounds reported.

CV waves of compounds **7a**, **8a** and **9a**, redox details of compounds **7a,b**, **8a,b** and **9a,b** along with those of **4a**, **5a** and **6a**

**Table S-1.** Redox potentials of **7a,b**, **8a,b**, **9a,b**, **4a**, **5a** and **6a**

| Cation    | $E_1^{\text{red}}$ | $E_2^{\text{red}}$ | $E_3^{\text{red}}$ | $E_4^{\text{red}}$ | $E_1^{\text{ox}}$ | $E_2^{\text{ox}}$ | $E_3^{\text{ox}}$ | Ref. |
|-----------|--------------------|--------------------|--------------------|--------------------|-------------------|-------------------|-------------------|------|
| <b>7a</b> | (-0.75)            | (-1.25)            | (-1.67)            | (-1.88)            | +0.81             | +0.91             | (+1.42)           |      |
| <b>7b</b> | -0.81              | (-1.51)            | (-1.72)            | (-2.00)            | +0.75             | +0.87             | (+1.44)           |      |
| <b>8a</b> | (-0.67)            | (-1.42)            | (-1.63)            | (-1.75)            | +0.85             | (+1.37)           |                   |      |
| <b>8b</b> | (-0.72)            | (-1.26)            | (-1.49)            | (-1.78)            | +0.82             | (+1.37)           |                   |      |
| <b>9a</b> | (-0.53)            | (-0.61)            | (-1.86)            | (-2.07)            | (+1.49)           |                   |                   |      |
| <b>9b</b> | (-0.58)            | (-1.49)            | (-1.64)            | (-1.92)            | (+1.51)           |                   |                   |      |
| <b>4a</b> | -0.78              | (-1.56)            |                    |                    | (+0.98)           | (+1.07)           |                   | 9d   |
| <b>5a</b> | -0.66              | (-1.52)            |                    |                    | (+1.04)           | -                 |                   | 9d   |
| <b>6a</b> | (-0.48)            | -                  |                    |                    | (+1.41)           | -                 |                   | 9d   |

The redox potentials were measured by CV or DPV (0.1 M Et<sub>4</sub>NClO<sub>4</sub> in MeCN, Pt electrode, scan rate 100 mV s<sup>-1</sup>, and  $Fc/Fc^+ = 0.08$  V). In the case of irreversible waves, which are shown in parentheses,  $E_{\text{ox}}$  and  $E_{\text{red}}$  were calculated as  $E_{\text{pa}}$  (anodic peak potential) - 0.03 and  $E_{\text{pc}}$  (cathodic peak potential) + 0.03 V, respectively.

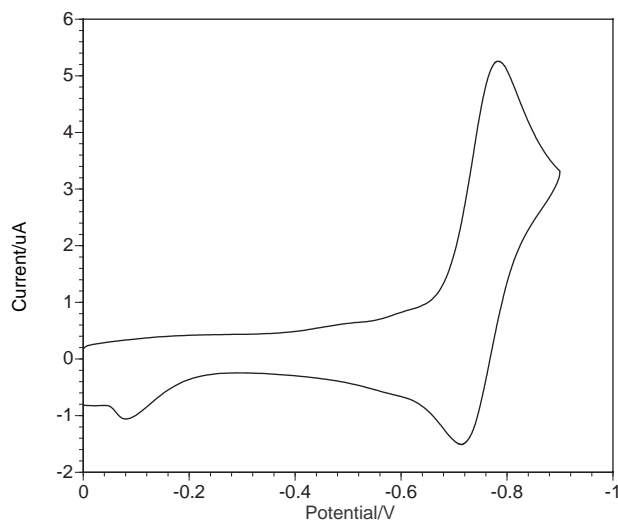

**Figure S-1.** Reduction wave of **7a** in acetonitrile containing  $\text{Et}_4\text{NBF}_4$  (0.1 M) as a supporting electrolyte.

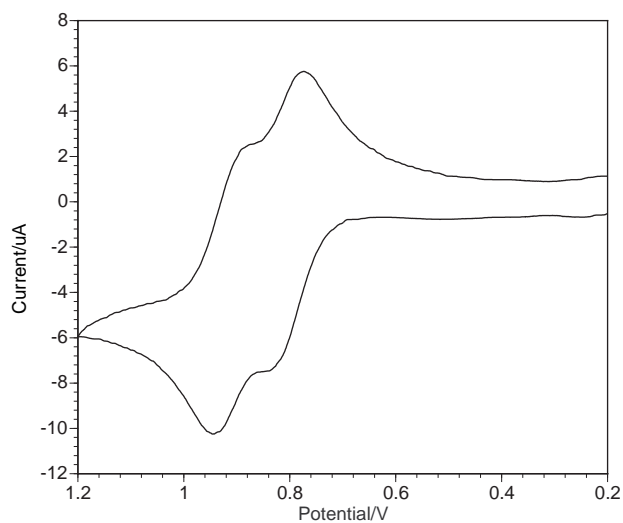

**Figure S-2.** Oxidation wave of **7a** in acetonitrile containing  $\text{Et}_4\text{NBF}_4$  (0.1 M) as a supporting electrolyte.

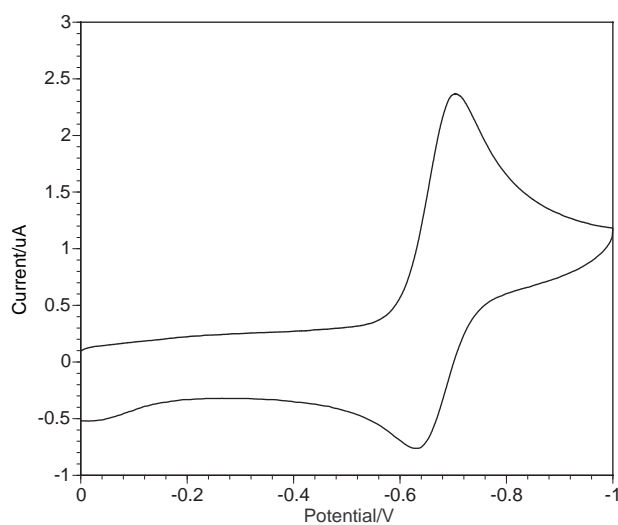

**Figure S-3.** Reduction wave of **8a** in acetonitrile containing  $\text{Et}_4\text{NBF}_4$  (0.1 M) as a supporting electrolyte.

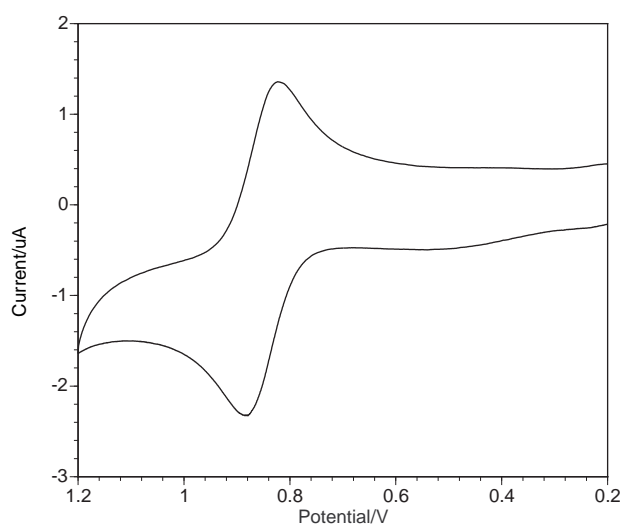

**Figure S-4.** Oxidation wave of **8a** in acetonitrile containing  $\text{Et}_4\text{NBF}_4$  (0.1 M) as a supporting electrolyte.

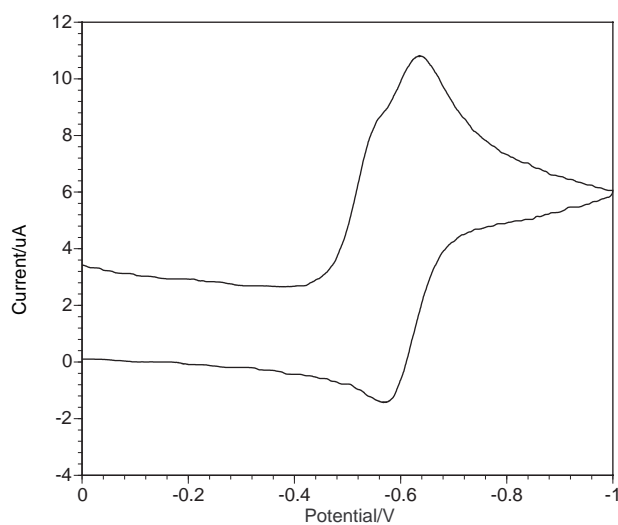

**Figure S-5.** Reduction wave of **9a** in acetonitrile containing  $\text{Et}_4\text{NBF}_4$  (0.1 M) as a supporting electrolyte.

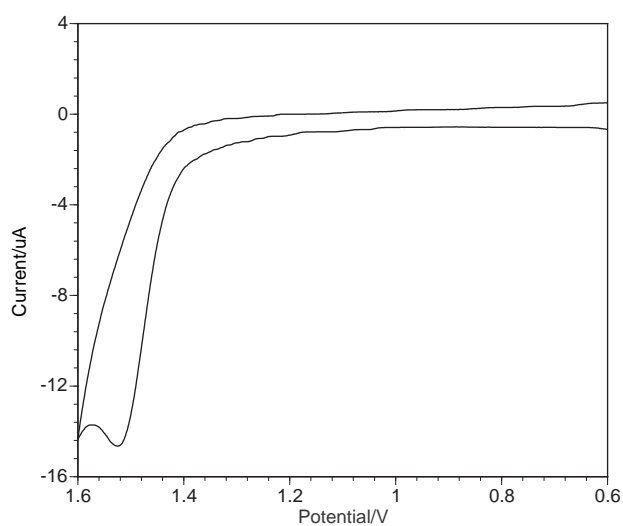

**Figure S-6.** Oxidation wave of **9a** in acetonitrile containing  $\text{Et}_4\text{NBF}_4$  (0.1 M) as a supporting electrolyte.

**ORTEP drawings and details of the X-ray analysis of compounds 2b and 9b****X-ray crystallographic data for 2b.**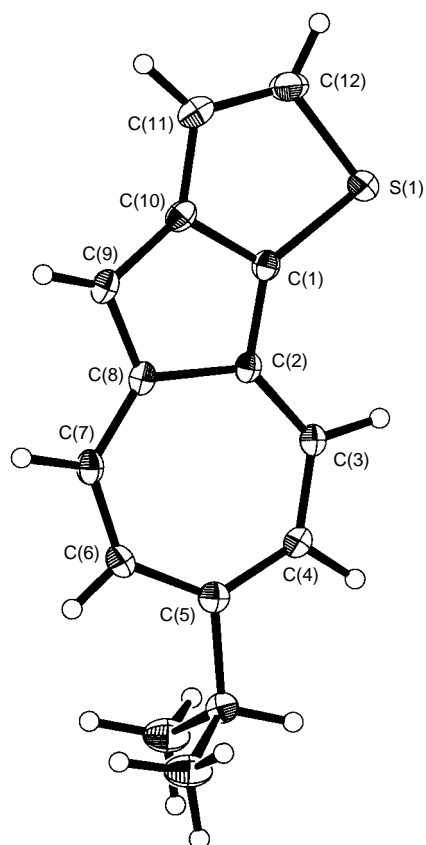

**Figure S-7.** ORTEP drawing of the molecule **2b** in the crystalline state along with the numbering scheme. Thermal ellipsoids are drawn at the 30% probability level. Selected bond lengths (Å): S(1)–C(1) = 1.727(2), S(1)–C(12) = 1.741(2), C(1)–C(2) = 1.415(2), C(1)–C(10) = 1.401(2), C(2)–C(3) = 1.372(2), C(2)–C(8) = 1.501(2), C(3)–C(4) = 1.409(2), C(4)–C(5) = 1.381(2), C(5)–C(6) = 1.420(2), C(6)–C(7) = 1.377(2), C(7)–C(8) = 1.404(2), C(8)–C(9) = 1.383(2), C(9)–C(10) = 1.426(2), C(10)–C(11) = 1.430(2) and C(11)–C(12) = 1.347(3).

Data and diffraction parameters were obtained for a crystal with dimension  $0.20 \times 0.20 \times 0.05$  mm using a Rigaku/MSM mercury CCD diffractometer with Mo-K $\alpha$  radiation ( $\lambda = 0.71070$  Å) at  $-100$  °C. Crystal system: monoclinic. Space group:  $P2_1/c$  (#14). Unit cell dimensions:  $a = 9.228(4)$  Å,  $b = 6.064(2)$  Å,  $c = 22.113(9)$  Å,  $\beta = 106.348(5)^\circ$ ,  $V = 1187.4(8)$  Å<sup>3</sup>,  $Z = 4$ .  $D_{\text{calcd}} = 1.266$  g cm<sup>-3</sup>.  $\mu$  (Mo-K $\alpha$ ) =  $2.40$  cm<sup>-1</sup>.  $F(000) = 480$ .  $2\theta$  range for data collection =  $0.0$ – $54.9^\circ$ . Number of measured reflections = 10892. Independent reflections = 2639 ( $R_{\text{int}} = 0.021$ ). Final  $R = 0.036$ ,  $R_w = 0.093$  for 1964 observed reflections (All,  $2\theta < 54.93^\circ$ ). Parameters = 201. GOF = 1.04.  $\Delta\rho_{\text{max}}$  and  $\Delta\rho_{\text{min}}$  are 0.23 and  $-0.17$  e<sup>-</sup> Å<sup>-3</sup>, respectively. Refinement method: full-matrix least squares using SHELX-97 program (Sheldrick, 1990), Final  $R1$  indices [ $I > 2\sigma I$ ]  $R1 = 0.0356$ ,  $wR2 = 0.0873$  and  $R$  indices (all data)  $R1 = 0.0458$ ,  $wR2 = 0.0928$  for refinement of all non-hydrogen atoms anisotropically and hydrogen atoms isotropically.

The mean deviation from the least-squares plane of the azuleno[1,2-*b*]thiophene moiety is  $0.0095$  Å. The total internal angle in the seven-membered ring is  $900.0^\circ$ , which is of that of an idealized seven-membered ring. The largest torsion angle in the seven-membered ring is observed around the C(2)–C(8) bond, but the angle is only  $-2.0(3)^\circ$ .

### X-ray crystallographic data for 9b.

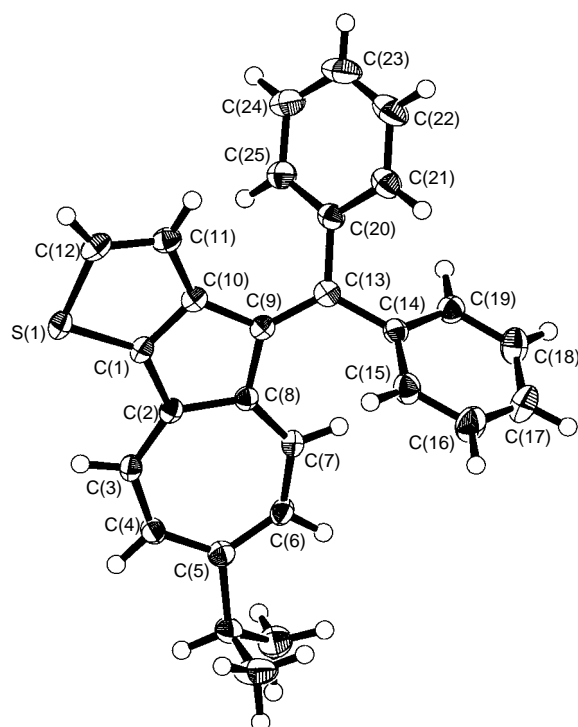

**Figure S-8.** ORTEP drawing of **9b**·FF<sub>6</sub><sup>-</sup>·DDQ in the crystalline state along with the numbering scheme. Thermal ellipsoids are drawn at the 30% probability level. The hexafluorophosphate counter anion and the DDQ molecule incorporated are omitted for clarity.

Data and diffraction parameters were obtained for a crystal with dimension  $0.25 \times 0.25 \times 0.08$  mm using a Rigaku/MSC mercury CCD diffractometer with Mo–K $\alpha$  radiation ( $\lambda = 0.71070$  Å) at  $-100$  °C. Crystal system: monoclinic. Space group:  $P2_1/c$  (#14). Unit cell dimensions:  $a = 11.160(4)$  Å,  $b = 28.552(9)$  Å,  $c = 9.773(4)$  Å,  $\beta = 108.615(5)^\circ$ ,  $V = 2950(1)$  Å<sup>3</sup>,  $Z = 4$ .  $D_{\text{calcd}} = 1.773$  g cm<sup>-3</sup>.  $\mu$  (Mo–K $\alpha$ ) =  $4.28$  cm<sup>-1</sup>.  $F(000) = 1600$ .  $2\theta$  range for data collection =  $0.0$ – $55.0^\circ$ . Number of measured reflections = 21560. Independent reflections = 6353 ( $R_{\text{int}} = 0.032$ ). Final  $R =$



0.041,  $R_w = 0.092$  for 4279 observed reflections (All,  $2\theta < 52.00^\circ$ ). Parameters = 547. GOF = 1.07.  $\Delta\rho_{\max}$  and  $\Delta\rho_{\min}$  are 0.20 and  $-0.36 \text{ e}^- \text{ \AA}^{-3}$ , respectively. Refinement method: full-matrix least squares using SHELX-97 program (Sheldrick, 1990). Disordered  $\text{PF}_6^-$  counter anion was divided into two  $\text{F}_6$  atoms with the ratio of 0.7 : 0.3 of occupancy by PART instruction and the geometry were restrained by SADI and also SIMU instruction was applied in F atoms. DDQ molecule was disordered by a center of symmetry with the same occupancy and the molecule was restrained in a planer by FLAT instruction. Final  $R1$  indices [ $I > 2\sigma I$ ]  $R1 = 0.0411$ ,  $wR2 = 0.0816$  and  $R$  indices (all data)  $R1 = 0.0692$ ,  $wR2 = 0.0916$  for refinement of all non-hydrogen atoms anisotropically and hydrogen atoms isotropically.

Faintly twisted boat conformation was found in the seven-membered ring, in which the greatest torsion angle  $-11.1(3)^\circ$  was observed through the C(7)–C(8) bond. The average C–C bond length in the seven-membered ring of **9b** was 1.398 Å, which was slightly shorter than that of **2b** (1.409 Å). The long 3b,8a-bond [1.444(3) Å] exhibits the incompleteness of the development of the azulonium ion substructure in the seven-membered ring, although the bond is apparently shorter than that of **2b** (1.501(2) Å). As expected, alternating pattern of the bond-lengths was not observed in the two phenyl rings on **9b**, although the phenyl rings exhibited slightly longer 1,2- and 1,6-bonds [C(14)–C(15), C(14)–C(19), C(20)–C(21) and C(20)–C(25)] compared with those of other ring bonds.

The C- $\alpha$  carbon [C(13)] in **9b** has an exactly planar structure with the sum of intermolecular bond angles around the C- $\alpha$  carbon of  $360.0^\circ$ . However, the relatively shorter C(13)–C(9) bond [1.379(3) Å] compared with C(13)–C(14) and C(13)–C(20) bonds [1.476(3) and 1.475(3) Å, respectively] corresponds to the distribution of a substantial amount of the positive charge into the azuleno[1,2-*b*]thiophene ring. The

distribution is reflected by the dihedral angles of each ring from the least-squares plane defined by the trivalent cationic carbon. Each plane of the two phenyl rings twisted by  $46.1^\circ$  and  $35.9^\circ$ , respectively, from the plane defined by the trivalent cationic carbon, whereas a much smaller dihedral angle ( $24.2^\circ$ ) was observed for that of the azuleno[1,2-*b*]thiophene ring.

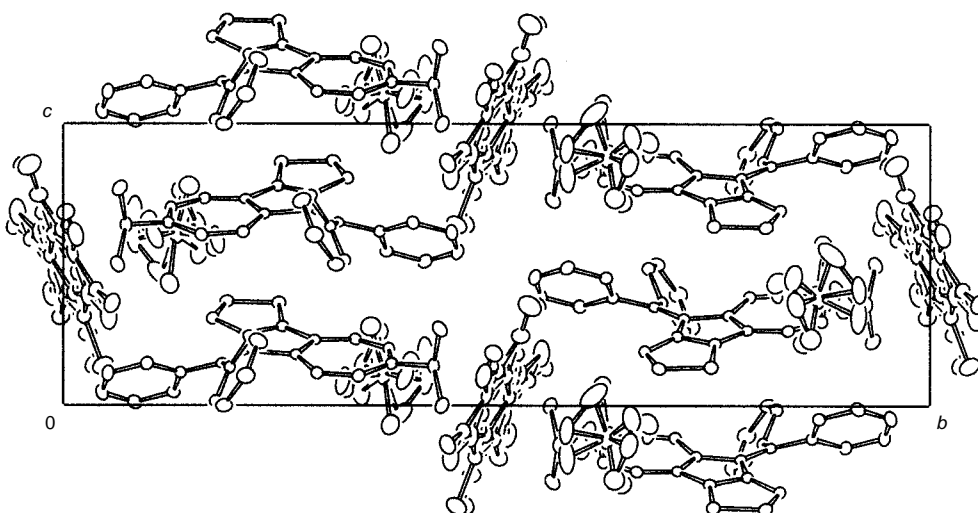

**Figure S-9.** Projection of the crystal structure of **9b** along *a*-axis.

The crystal structure of **9b**·PF<sub>6</sub><sup>-</sup>·DDQ viewed along the *c*-axis is shown in Figure S-9. The counter anion (PF<sub>6</sub><sup>-</sup>) was located relatively near the seven-membered ring. There is some interaction between the thiophene ring and the seven-membered part of the neighboring molecule in the single crystal. Closely contacted distances were observed between the overlapping molecules {3.413(3) Å [C(6) and C(11)], 3.473(2) Å [C(7) and C(10)] and 3.485(2) Å [C(7) and C(11)]}. The interatomic distances suggest the  $\pi\cdots\pi$  intermolecular interactions of the neighboring molecule in the single crystal.

**NMR details of compounds reported****Methyl 1,2-Dihydro-6-isopropyl-9-(azuleno[1,2-*b*]thiophene)carboxylate 12.**

$\delta_{\text{H}}$  (500 MHz, Acetone- $d_6$ ) 9.14 (d,  $J$  10.2, 1H, 8-H), 7.83 (d,  $J$  10.4, 1H, 4-H), 7.34 (d,  $J$  10.2, 1.5, 1H, 7-H), 7.26 (d,  $J$  10.4, 1.5, 1H, 5-H), 3.87 (t,  $J$  7.6, 2H, 1-H), 3.87 (s, 3H, 9-COOMe), 3.61 (t,  $J$  7.6, 2H, 2-H), 3.08 (sept,  $J$  6.9, 1H, 6-*i*Pr) and 1.33 (d,  $J$  6.9, 6H, 6-*i*Pr);  $\delta_{\text{C}}$  (125 MHz, Acetone- $d_6$ ) 165.5 (s, 9-COOMe), 161.4 (C-6), 159.9 (C-9a), 144.9 (C-8a), 135.9 (C-8), 135.8 (C-4), 131.5 (C-3a), 131.3 (C-3b), 126.5 (C-7), 126.0 (C-5), 110.8 (C-9), 51.1 (q, 9-COOMe), 40.2 (d, 6-*i*Pr), 39.7 (C-1), 33.4 (C-2) and 24.3 (q, 6-*i*Pr).

**Methyl 1,3-Dihydro-6-isopropyl-9-(azuleno[1,2-*c*]thiophene)carboxylate 13.**

$\delta_{\text{H}}$  (500 MHz,  $\text{CDCl}_3$ ) 9.44 (d,  $J$  10.4, 1H, 8-H), 8.07 (d,  $J$  10.1, 1H, 4-H), 7.46 (dd,  $J$  10.4, 1.5, 1H, 7-H), 7.37 (dd,  $J$  10.1, 1.5, 1H, 5-H), 4.60 (t,  $J$  2.0, 2H, 1-H), 4.37 (t,  $J$  2.0, 2H, 3-H), 3.93 (s, 3H, 9-COOMe), 3.13 (sept,  $J$  6.9, 1H, 6-*i*Pr) and 1.37 (d,  $J$  6.9, 6H, 6-*i*Pr);  $\delta_{\text{C}}$  (125 MHz,  $\text{CDCl}_3$ ) 165.6 (s, 9-COOMe), 160.9 (C-6), 157.8 (C-9a), 144.4 (C-8a), 137.2 (C-8), 134.6 (C-4), 134.0 (C-3b), 132.5 (C-3a), 127.4 (C-7), 126.2 (C-5), 109.0 (C-9), 51.0 (q, 9-COOMe), 39.7 (d, 6-*i*Pr), 35.7 (C-1), 30.7 (C-3) and 24.3 (q, 6-*i*Pr).

**Methyl 6-Isopropyl-9-(azuleno[1,2-*b*]thiophene)carboxylate 14.**

$\delta_{\text{H}}$  (500 MHz,  $\text{CDCl}_3$ ) 9.67 (d,  $J$  11.0, 1H, 8-H), 8.48 (d,  $J$  9.8, 1H, 4-H), 7.77 (d,  $J$  5.0, 1H, 2-H), 7.76 (d,  $J$  5.0, 1H, 1-H), 7.53 (dd,  $J$  11.0, 1.6, 1H, 7-H), 7.44 (dd,  $J$  9.8, 1.6, 1H, 5-H), 4.02 (s, 3H, 9-COOMe), 3.17 (sept,  $J$  6.9, 1H, 6-*i*Pr) and 1.39 (d,  $J$  6.9, 6H, 6-*i*Pr);  $\delta_{\text{C}}$  (125 MHz,  $\text{CDCl}_3$ ) 165.9 (s, 9-COOMe), 160.2 (C-6), 152.4 (C-9a),

144.4 (C-8a), 137.2 (C-8), 134.3 (C-3b), 133.6 (C-2), 133.0 (C-4), 130.3 (C-3a), 128.1 (C-7), 125.5 (C-5), 121.2 (C-1), 107.6 (C-9), 51.0 (q, 9-COOMe), 39.7 (d, 6-*i*Pr) and 24.3 (q, 6-*i*Pr).

**6-Isopropylazuleno[1,2-*b*]thiophene 2b.**

$\delta_{\text{H}}$  (500 MHz, Acetone- $d_6$ ) 8.36 (dd,  $J$  9.3, 0.9, 1H, 4-H), 8.31 (d,  $J$  10.8, 1H, 8-H), 7.87 (d,  $J$  5.0, 1H, 2-H), 7.45 (d,  $J$  5.0, 1H, 1-H), 7.43 (br s, 1H, 9-H), 7.20 (dd,  $J$  9.3, 1.5, 1H, 5-H), 7.13 (dd,  $J$  10.8, 1.5, 1H, 7-H), 3.09 (sept,  $J$  6.9, 1H, 6-*i*Pr) and 1.34 (d,  $J$  6.9, 6H, 6-*i*Pr);  $\delta_{\text{C}}$  (125 MHz, Acetone- $d_6$ ) 158.6 (C-6), 153.1 (C-9a), 142.4 (C-8a), 137.3 (C-8), 133.5 (C-2), 132.2 (C-3b), 131.6 (C-4), 130.7 (C-3a), 123.1 (C-7), 121.7 (C-5), 119.8 (C-1), 110.0 (C-9), 40.3 (d, 6-*i*Pr) and 24.4 (q, 6-*i*Pr).

**9-(Azuleno[1,2-*b*]thiophene)carbaldehyde 15a.**

$\delta_{\text{H}}$  (400 MHz,  $\text{CDCl}_3$ ) 10.61 (s, 1H, 9-CHO), 9.28 (d,  $J$  10.3, 1H, 8-H), 8.52 (d,  $J$  9.3, 1H, 4-H), 7.89 (d,  $J$  5.0, 1H, 2-H), 7.87 (d,  $J$  5.0, 1H, 1-H), 7.81 (dd,  $J$  9.8, 9.8, 1H, 6-H), 7.59 (dd,  $J$  10.3, 9.8, 1H, 7-H) and 7.54 (dd,  $J$  9.8, 9.3, 1H, 5-H);  $\delta_{\text{C}}$  (100 MHz,  $\text{CDCl}_3$ ) 183.3 (9-CHO), 153.0 (C-9a), 146.5 (C-8a), 138.1 (C-6), 136.3 (C-2), 136.2 (C-3b), 135.1 (C-8), 133.9 (C-4), 132.3 (C-3a), 129.2 (C-7), 128.5 (C-5), 119.5 (C-1) and 117.3 (C-9).

**6-Isopropyl-9-(azuleno[1,2-*b*]thiophene)carbaldehyde 15b.**

$\delta_{\text{H}}$  (500 MHz,  $\text{CDCl}_3$ ) 10.59 (s, 1H, 9-CHO), 9.29 (d,  $J$  10.7, 1H, 8-H), 8.52 (d,  $J$  9.8, 1H, 4-H), 7.87 (d,  $J$  5.0, 1H, 1-H), 7.85 (d,  $J$  5.0, 1H, 2-H), 7.59 (dd,  $J$  10.7, 1.5, 1H, 7-H), 7.53 (dd,  $J$  9.8, 1.5, 1H, 5-H), 3.19 (sept,  $J$  6.9, 1H, 6-*i*Pr) and 1.41 (d,  $J$  6.9, 6H, 6-*i*Pr);  $\delta_{\text{C}}$  (125 MHz,  $\text{CDCl}_3$ ) 183.0 (9-CHO), 161.3 (C-6), 152.3 (C-9a), 145.7 (C-8a), 135.5 (C-2), 135.2 (C-3b), 135.1 (C-8), 134.0 (C-4), 132.3 (C-3a), 129.4 (C-7),

127.5 (C-5), 119.5 (C-1), 117.0 (C-9), 39.8 (d, 6-*i*Pr) and 24.3 (q, 6-*i*Pr).

**Tris[9-(azuleno[1,2-*b*]thienyl)]methane 16a.**

$\delta_{\text{H}}$  (400 MHz, 50%  $\text{CDCl}_3/\text{CS}_2$ ) 8.31 (d,  $J$  8.8, 3H, 4-H), 8.18 (d,  $J$  10.5, 3H, 8-H), 7.69 (s, 1H, CH), 7.40 (dd,  $J$  10.5, 9.1, 3H, 6-H), 7.22 (d,  $J$  5.1, 3H, 2-H), 7.10 (dd,  $J$  10.5, 8.8, 3H, 5-H), 6.83 (dd,  $J$  10.5, 9.1, 3H, 7-H) and 5.50 (d,  $J$  5.1, 3H, 1-H);  $\delta_{\text{C}}$  (100 MHz, 50%  $\text{CDCl}_3/\text{CS}_2$ ) 153.1 (C-9a), 136.7 (C-8a), 135.5 (C-6), 133.5 (C-8), 133.0 (C-3b), 132.6 (C-2), 130.3 (C-4), 129.5 (C-3a), 123.6 (C-9), 122.8 (C-5), 121.4 (C-7), 119.4 (C-1) and 35.8 (CH).

**Tris[6-isopropyl-9-(azuleno[1,2-*b*]thienyl)]methane 16b.**

$\delta_{\text{H}}$  (500 MHz, 50%  $\text{CDCl}_3/\text{CS}_2$ ) 8.17 (d,  $J$  9.5, 3H, 4-H), 8.06 (d,  $J$  11.0, 3H, 8-H), 7.55 (s, 1H, CH), 7.14 (d,  $J$  5.1, 3H, 2-H), 6.97 (dd,  $J$  9.5, 1.5, 3H, 5-H), 6.72 (dd,  $J$  11.0, 1.5, 3H, 7-H), 5.52 (d,  $J$  5.1, 3H, 1-H), 2.93 (sept,  $J$  6.8, 3H, 6-*i*Pr), 1.29 (d,  $J$  6.8, 9H, 6-*i*Pr) and 1.28 (d,  $J$  6.8, 9H, 6-*i*Pr);  $\delta_{\text{C}}$  (125 MHz, 50%  $\text{CDCl}_3/\text{CS}_2$ ) 156.6 (C-6), 152.2 (C-9a), 135.5 (C-8a), 133.1 (C-8), 131.5 (C-2 and C-3b), 130.0 (C-4), 129.3 (C-3a), 123.5 (C-9), 121.4 (C-7), 120.5 (C-5), 119.5 (C-1), 39.6 (d, 6-*i*Pr), 35.4 (CH) and 24.1 (q, 6-*i*Pr).

**Bis[9-(azuleno[1,2-*b*]thienyl)]phenylmethane 18a.**

$\delta_{\text{H}}$  (400 MHz, 50%  $\text{CDCl}_3/\text{CS}_2$ ) 8.29 (d,  $J$  8.8, 2H, 4-H), 8.19 (d,  $J$  10.5, 2H, 8-H), 7.41 (dd,  $J$  10.5, 9.3, 2H, 6-H), 7.36 (d,  $J$  5.1, 2H, 2-H), 7.25—7.23 (m, 3H, 3',4',5'-H), 7.17—7.15 (m, 2H, 2',6'-H), 7.09 (dd,  $J$  10.5, 8.8, 2H, 5-H), 7.02 (s, 1H, CH), 6.89 (dd,  $J$  10.5, 9.3, 2H, 7-H) and 5.94 (d,  $J$  5.1, 2H, 1-H);  $\delta_{\text{C}}$  (100 MHz, 50%  $\text{CDCl}_3/\text{CS}_2$ ) 153.1 (C-9a), 144.0 (C-1'), 136.9 (C-8a), 135.5 (C-6), 133.4 (C-8), 133.1 (C-3b), 132.4 (C-2), 130.3 (C-4), 129.7 (C-3a), 129.2 (C-2',6'), 128.3 (C-3',5'), 126.5

(C-4'), 123.6 (C-9), 122.9 (C-5), 121.5 (C-7), 119.6 (C-1) and 42.3 (CH).

**Bis[6-isopropyl-9-(azuleno[1,2-*b*]thienyl)]phenylmethane 18b.**

$\delta_{\text{H}}$  (500 MHz,  $\text{CDCl}_3$ ) 8.25 (d,  $J$  9.3, 2H, 4-H), 8.18 (d,  $J$  11.1, 2H, 8-H), 7.34 (d,  $J$  5.1, 2H, 2-H), 7.25—7.24 (m, 3H, 3',4',5'-H), 7.18—7.16 (m, 2H, 2',6'-H), 7.03 (dd,  $J$  9.3, 1.5, 2H, 5-H), 7.01 (s, 1H, CH), 6.87 (dd,  $J$  11.1, 1.5, 2H, 7-H), 6.01 (d,  $J$  5.1, 2H, 1-H), 2.98 (sept,  $J$  6.9, 2H, 6-*i*Pr) and 1.30 (d,  $J$  6.9, 12H, 6-*i*Pr);  $\delta_{\text{C}}$  (125 MHz,  $\text{CDCl}_3$ ) 157.3 (C-6), 152.4 (C-9a), 144.5 (C-1'), 135.9 (C-8a), 133.1 (C-8), 131.7 (C-3b), 131.4 (C-2), 130.2 (C-4), 129.6 (C-3a), 129.2 (C-2',6'), 128.3 (C-3',5'), 126.4 (C-4'), 123.5 (C-9), 121.9 (C-7), 120.7 (C-5), 119.6 (C-1), 42.1 (CH), 39.6 (d, 6-*i*Pr), 24.2 (q, 6-*i*Pr) and 24.1 (q, 6-*i*Pr).

**[9-(Azuleno[1,2-*b*]thienyl)]diphenylmethane 20a.**

$\delta_{\text{H}}$  (400 MHz,  $\text{CDCl}_3$ ) 8.30 (d,  $J$  8.8, 1H, 4-H), 8.25 (d,  $J$  10.5, 1H, 8-H), 7.48 (d,  $J$  5.1, 1H, 2-H), 7.42 (dd,  $J$  10.6, 9.2, 1H, 6-H), 7.28—7.16 (m, 10H, 2',3',4',5',6'-H), 7.09 (dd,  $J$  10.6, 8.8, 1H, 5-H), 6.96 (dd,  $J$  10.5, 9.2, 1H, 7-H), 6.37 (d,  $J$  5.1, 1H, 1-H) and 6.31 (s, 1H, CH);  $\delta_{\text{C}}$  (100 MHz,  $\text{CDCl}_3$ ) 153.0 (C-9a), 143.9 (C-1'), 137.0 (C-8a), 135.7 (C-6), 133.4 (C-8), 133.1 (C-3b), 132.4 (C-2), 130.3 (C-4), 129.9 (C-3a), 129.2 (C-2',6'), 128.3 (C-3',5'), 126.3 (C-4'), 124.0 (C-9), 122.9 (C-5), 121.6 (C-7), 119.6 (C-1) and 49.2 (CH).

**[6-Isopropyl-9-(azuleno[1,2-*b*]thienyl)]diphenylmethane 20b.**

$\delta_{\text{H}}$  (600 MHz,  $\text{CDCl}_3$ ) 8.24 (d,  $J$  9.3, 1H, 4-H), 8.21 (d,  $J$  11.1, 1H, 8-H), 7.44 (d,  $J$  5.1, 1H, 2-H), 7.26 (m, 4H, 3',5'-H), 7.21 (m, 2H, 4'-H), 7.18 (m, 4H, 2',6'-H), 7.04 (dd,  $J$  9.3, 1.6, 1H, 5-H), 6.95 (dd,  $J$  11.1, 1.6, 1H, 7-H), 6.36 (d,  $J$  5.1, 1H, 1-H), 6.29 (s, 1H, CH), 3.00 (sept,  $J$  6.8, 1H, 6-*i*Pr) and 1.32 (d,  $J$  6.8, 6H, 6-*i*Pr);  $\delta_{\text{C}}$  (150

MHz, CDCl<sub>3</sub>) 157.5 (C-6), 152.1 (C-9a), 144.0 (C-1'), 136.0 (C-8a), 133.0 (C-8), 131.7 (C-3b), 131.4 (C-2), 130.3 (C-4), 129.9 (C-3a), 129.3 (C-2',6'), 128.3 (C-3',5'), 126.3 (C-4'), 123.7 (C-9), 121.9 (C-7), 120.8 (C-5), 119.6 (C-1), 49.1 (CH), 39.6 (d, 6-*i*Pr) and 24.2 (q, 6-*i*Pr).

**Tris[9-(azuleno[1,2-*b*]thienyl)]methylum Hexafluorophosphate (7a·PF<sub>6</sub><sup>-</sup>).**

$\delta_{\text{H}}$  (600 MHz, (CDCl<sub>2</sub>)<sub>2</sub>)  $\delta$  = 8.71—8.67 (m, 3H, A-4-H and 3H, B-4-H), 8.12 (d, *J* 10.3, 3H, A-8-H), 7.92 (d, 1H, B-8-H), 7.91 (d, 1H, B-8-H), 7.84 (dd, 3H, A-6-H), 7.80 (dd, 1H, B-6-H), 7.78 (dd, 3H, A-5-H), 7.78 (dd, 1H, B-6-H), 7.75 (dd, 1H, B-5-H), 7.73 (dd, 1H, B-5-H and 1H, B-6-H), 7.70 (dd, 1H, B-5-H and d, 1H, B-8-H), 7.64 (d, *J* 5.1, 1H, B-2-H), 7.58 (d, *J* 5.1, 1H, B-2-H), 7.56 (d, *J* 5.1, 1H, B-2-H), 7.50 (d, *J* 5.1, 3H, A-2-H), 7.25 (dd, *J* 10.3, 9.5, 3H, A-7-H), 7.18 (dd, 1H, B-7-H), 7.11 (dd, 1H, B-7-H), 7.05 (dd, 1H, B-7-H), 6.29 (d, *J* 5.1, 1H, B-1-H), 6.09 (d, *J* 5.1, 1H, B-1-H), 6.05 (d, *J* 5.1, 1H, B-1-H) and 5.87 (d, *J* 5.1, 3H, A-1-H);  $\delta_{\text{C}}$  (125 MHz, (CDCl<sub>2</sub>)<sub>2</sub>) 155.2 (A-C-9a and B-C-9a), 155.0 (2C, B-C-9a), 150.5 (B-C-8a), 150.4 (B-C-8a), 149.3 (A-C-8a and B-C-8a), 148.3 (C<sup>+</sup>), 148.1 (C<sup>+</sup>), 142.1 (B-C-3b), 141.9 (A-C-3b), 141.6 (B-C-3b and B-C-6), 141.5 (B-C-3b), 141.2 (A-C-6 and B-C-6), 140.8 (B-C-6), 138.9 (A-C-8), 138.5 (B-C-8), 138.3 (B-C-2 and B-C-8), 138.0 (B-C-8), 137.8 (A-C-2 and 2C, B-C-2), 136.8 (B-C-3a), 136.3 (A-C-3a and B-C-3a), 136.2 (C-4), 135.9 (C-4), 135.8 (C-4 and B-C-3a), 135.6 (C-4), 133.1 (B-C-5), 133.0 (B-C-7), 132.9 (A-C-5 and A-C-7), 132.6 (B-C-5 and B-C-7), 132.5 (B-C-5 and B-C-7), 123.6 (C-9), 123.3 (C-9), 121.0 (B-C-1), 120.7 (B-C-1), 120.6 (B-C-1) and 120.3 (A-C-1).

**Tris[6-isopropyl-9-(azuleno[1,2-*b*]thienyl)]methylum Hexafluorophosphate (7b·PF<sub>6</sub><sup>-</sup>).**

$\delta_{\text{H}}$  (600 MHz, C<sub>6</sub>D<sub>6</sub>:CDCl<sub>3</sub> = 1:30) 8.71 (d, *J* 10.0, 1H, B-4-H), 8.64 (d, *J* 9.9,

1H, **B-4-H**), 8.63 (d, *J* 9.9, 3H, **A-4-H**), 8.62 (d, 1H, **B-4-H**), 8.15 (d, *J* 10.6, 3H, **A-8-H**), 7.95 (d, *J* 10.8, 1H, **B-8-H**), 7.91 (d, *J* 10.7, 1H, **B-8-H**), 7.75 (d, *J* 10.0, 1H, **B-5-H**), 7.72 (d, *J* 10.6, 1H, **B-8-H**), 7.70 (d, *J* 9.9, 3H, **A-5-H**), 7.65 (d, 1H, *J* 9.9, **B-5-H** and 1H, **B-5-H**), 7.54 (d, *J* 5.0, 1H, **B-2-H**), 7.49 (d, *J* 5.0, 1H, **B-2-H**), 7.47 (d, *J* 5.0, 1H, **B-2-H**), 7.39 (d, *J* 5.1, 3H, **A-2-H**), 7.20 (d, *J* 10.6, 3H, **A-7-H**), 7.12 (d, *J* 10.8, 1H, **B-7-H**), 7.05 (d, *J* 10.7, 1H, **B-7-H**), 6.98 (d, *J* 10.6, 1H, **B-7-H**), 6.28 (d, *J* 5.0, 1H, **B-1-H**), 6.14 (d, *J* 5.0, 1H, **B-1-H**), 6.08 (d, *J* 5.0, 1H, **B-1-H**), 5.95 (d, *J* 5.1, 3H, **A-H1**), 3.09—2.98 (m, 3H, **A-6-*i*Pr** and 3H, **B-6-*i*Pr**) and 1.29—1.19 (m, 18H, **A-6-*i*Pr** and 18H, **B-6-*i*Pr**);  $\delta_{\text{C}}$  (125 MHz,  $\text{CDCl}_3$ ) 165.1 (C-6), 164.5 (2C, C-6), 163.9 (C-6), 154.2 (**B-C-9a**), 154.1 (**A-C-9a**), 153.9 (2C, **B-C-9a**), 148.9 (**B-C-8a**), 148.7 (**B-C-8a**), 147.9 (C<sup>+</sup>), 147.7 (**A-C-8a**), 147.5 (C<sup>+</sup>), 147.4 (**B-C-8a**), 140.7 (**B-C-3b**), 140.1 (**A-C-3b**), 140.0 (**B-C-3b**), 139.5 (**B-C-3b**), 138.6 (**A-C-8**), 138.1 (**B-C-8**), 137.8 (**B-C-8**), 137.6 (**B-C-8**), 136.6 (**B-C-2**), 136.5 (**B-C-3a**), 136.3 (**B-C-2**), 136.0 (**A-C-2** and **B-C-4**), 135.9 (**B-C-2**), 135.7 (**B-C-3a**), 135.6 (**A-C-3a**), 135.5 (**B-C-4**), 135.3 (**A-C-4**), 135.0 (**B-C-3a**), 134.9 (**B-C-4**), 132.0 (**B-C-5** and **A-** and **B-C-7**), 131.5 (2C, **B-C-7**), 131.4 (**A-C-5**), 131.2 (**B-C-5**), 130.7 (**B-C-5**), 123.3 (C-9), 122.9 (C-9), 120.5 (**B-C-1**), 120.3 (**B-C-1**), 120.2 (**B-C-1**), 120.0 (**A-C-1**), 39.7 (d, 6-*i*Pr), 39.7 (d, 6-*i*Pr), 39.7 (d, 6-*i*Pr), 24.2 (q, 6-*i*Pr), 24.0 (q, 6-*i*Pr), 23.9 (q, 6-*i*Pr) and 23.9 (q, 6-*i*Pr).

**Bis[9-(azuleno[1,2-*b*]thienyl)]phenylmethylium Hexafluorophosphate (**8a**·PF<sub>6</sub><sup>-</sup>).**

$\delta_{\text{H}}$  (500 MHz,  $(\text{CDCl}_2)_2$ , 50 °C) 8.72—8.70 (m, 2H, 4-H), 7.99—7.92 (m, 4H, 5,6-H), 7.93 (d, *J* 10.1, 2H, 8-H), 7.75 (tt, *J* 7.5, 1.2, 1H, 4'-H), 7.71 (d, *J* 5.1, 2H, 2-H), 7.53 (dd, *J* 8.3, 7.5, 2H, 3',5'-H), 7.45 (dd, *J* 8.3, 1.2, 2H, 2',6'-H), 7.44—7.39 (m, 2H, 7-H) and 6.12 (d, *J* 5.1, 2H, 1-H);  $\delta_{\text{C}}$  (125 MHz,  $(\text{CDCl}_2)_2$ , 50 °C) 158.3 (C<sup>+</sup>), 155.9 (C-9a), 152.2 (C-8a), 145.0 (C-3b), 142.5 (C-6), 141.4 (C-1'), 140.1 (C-8), 139.2 (C-2), 138.4 (C-3a), 136.6 (C-4), 136.1 (C-5), 135.5 (C-7), 133.6 (C-2',6'), 133.5 (C-4'),



130.0 (C-3',5'), 125.2 (C-9) and 121.4 (C-1).

**Bis[6-isopropyl-9-(azuleno[1,2-*b*]thienyl)]phenylmethylium Hexafluorophosphate (8b·PF<sub>6</sub><sup>-</sup>).**

$\delta_{\text{H}}$  (500 MHz, CD<sub>2</sub>Cl<sub>2</sub>) 8.69 (d, *J* 10.3, 2H, 4-H), 7.91 (d, *J* 10.7, 2H, 8-H), 7.89 (dd, *J* 10.3, 1.8, 2H, 5-H), 7.76 (tt, *J* 7.5, 1.3, 1H, 4'-H), 7.67 (d, *J* 5.0, 2H, 2-H), 7.56 (dd, *J* 8.2, 7.5, 2H, 3',5'-H), 7.47 (dd, *J* 8.2, 1.3, 2H, 2',6'-H), 7.31 (dd, *J* 10.7, 1.8, 2H, 7-H), 6.16 (d, *J* 5.0, 2H, 1-H), 3.12 (sept, *J* 6.9, 2H, 6-*i*Pr) and 1.29 (d, *J* 6.9, 12H, 6-*i*Pr);  $\delta_{\text{C}}$  (125 MHz, CD<sub>2</sub>Cl<sub>2</sub>) 166.8 (C-6), 157.8 (C<sup>+</sup>), 155.3 (C-9a), 150.9 (C-8a), 143.7 (C-3b), 141.9 (C-1'), 140.0 (C-8), 138.3 (C-3a), 137.7 (C-2), 136.4 (C-4), 135.2 (C-5), 134.6 (C-7), 133.7 (C-2',6'), 133.2 (C-4'), 129.9 (C-3',5'), 125.3 (C-9), 121.6 (C-1), 40.3 (d, 6-*i*Pr), 24.1 (q, 6-*i*Pr) and 24.1 (q, 6-*i*Pr).

**[9-(Azuleno[1,2-*b*]thienyl)]diphenylmethylium Hexafluorophosphate (9a·PF<sub>6</sub><sup>-</sup>).**

$\delta_{\text{H}}$  (500 MHz, CDCl<sub>3</sub>) 8.70 (d, *J* 9.9, 1H, 4-H), 8.34 (dd, *J* 9.9, 9.5, 1H, 5-H), 8.22 (dd, *J* 9.8, 9.5, 1H, 6-H), 8.03 (d, *J* 9.8, 1H, 8-H), 7.88 (dd, *J* 9.8, 9.8, 1H, 7-H), 7.83 (d, *J* 5.1, 1H, 2-H), 7.70 (tt, *J* 7.4, 1.2, 1H, 4''-H), 7.69 (tt, *J* 7.5, 1.2, 1H, 4'-H), 7.53 (dd, *J* 8.2, 7.5, 2H, 3',5'-H), 7.50 (dd, *J* 8.2, 7.4, 2H, 3'',5''-H), 7.40 (dd, *J* 8.2, 1.2, 1H, 2',6'-H), 7.24 (dd, *J* 8.2, 1.2, 2H, 2'',6''-H) and 6.37 (d, *J* 5.1, 1H, 1-H);  $\delta_{\text{C}}$  (125 MHz, CDCl<sub>3</sub>) 168.5 (C<sup>+</sup>), 158.5 (C-8a), 157.2 (C-9a), 154.1 (C-3b), 146.0 (C-6), 144.8 (C-5), 143.9 (C-8), 143.6 (C-3a), 142.6 (C-2), 141.9 (C-7), 140.6 (C-1' or C-1''), 139.8 (C-1' or C-1''), 138.5 (C-4), 134.4 (C-4''), 134.3 (C-2'',6''), 134.1 (C-4'), 133.4 (C-2',6'), 130.5 (C-9), 129.9 (C-3'',5''), 129.8 (C-3',5') and 123.1 (C-1).

**[6-Isopropyl-9-(azuleno[1,2-*b*]thienyl)]diphenylmethylium Hexafluorophosphate (9b·PF<sub>6</sub><sup>-</sup>).**

$\delta_{\text{H}}$  (600 MHz,  $\text{CDCl}_3$ ) 8.80 (d,  $J$  10.6, 1H, 4-H), 8.45 (dd,  $J$  10.6, 1.8, 1H, 5-H), 8.08 (d,  $J$  10.4, 1H, 8-H), 7.86 (dd,  $J$  10.4, 1.8, 1H, 7-H), 7.76 (d,  $J$  5.0, 1H, 2-H), 7.73 (tt,  $J$  7.5, 1.2, 1H, 4'-H or 4''-H), 7.70 (tt,  $J$  7.5, 1.2, 1H, 4'-H or 4''-H), 7.57 (dd,  $J$  8.3, 7.5, 2H, 3',5'-H or 3'',5''-H), 7.57 (dd,  $J$  8.3, 7.5, 2H, 3',5'-H or 3'',5''-H), 7.45 (dd,  $J$  8.3, 1.2, 2H, 2',6'-H or 2'',6''-H), 7.33 (dd,  $J$  8.3, 1.2, 2H, 2',6'-H or 2'',6''-H), 6.36 (d,  $J$  5.0, 1H, 1-H), 3.29 (sept,  $J$  6.8, 1H, 6-*i*Pr) and 1.39 (d,  $J$  6.8, 1H, 6-*i*Pr);  $\delta_{\text{C}}$  (150 MHz,  $\text{CDCl}_3$ ) 171.5 (C-6), 165.8 (C<sup>+</sup>), 156.2 (C-8a), 155.5 (C-9a), 153.2 (C-3b), 145.4 (C-5), 143.6 (C-3a), 143.5 (C-8), 140.9 (C-1' or C-1''), 140.7 (C-7), 140.4 (C-2), 139.7 (C-1' or C-1''), 138.4 (C-4), 133.5 (C-2',6' or C-2'',6''), 133.4 (C-4' or C-4''), 132.8 (C-4' or C-4''), 132.6 (C-2',6' or C-2'',6''), 130.7 (C-9), 129.5 (C-3',5' or C-3'',5''), 129.3 (C-3',5' or C-3'',5''), 122.7 (C-1), 40.1 (d, 6-*i*Pr) and 23.7 (q, 6-*i*Pr).
